# Supplementary material for: Diversity and Biotic Homogenization of Urban Land-Snail Faunas in Relation to Habitat Types and Macroclimate in 32 Central European Cities
Source: PubMed Central journal article supplement (PMC3735557; doi:10.1371/journal.pone.0071783), 2013-08-06
Supplement: pone.0071783.s001.pdf [file pone.0071783.s001.pdf]

Table S1. List of native and alien species recorded in 32 Central European cities; numbers of plots and cities with the species presence are given.

| <b>Native species</b>                          | No. of plots | No. of cities |
|------------------------------------------------|--------------|---------------|
| <i>Cochlicopa lubrica</i> (Müller, 1774)       | 131          | 32            |
| <i>Vallonia pulchella</i> (Müller, 1774)       | 120          | 28            |
| <i>Trochulus hispidus</i> (Linné, 1758)        | 91           | 26            |
| <i>Vallonia costata</i> (Müller, 1774)         | 84           | 24            |
| <i>Cepaea nemoralis</i> (Linné, 1758)          | 72           | 18            |
| <i>Helix pomatia</i> Linné, 1758               | 68           | 22            |
| <i>Cepaea hortensis</i> (Müller, 1774)         | 66           | 21            |
| <i>Discus rotundatus</i> (Müller, 1774)        | 62           | 23            |
| <i>Aegopinella nitidula</i> (Draparnaud, 1805) | 41           | 17            |
| <i>Alinda biplicata</i> (Montagu, 1803)        | 35           | 15            |
| <i>Pupilla muscorum</i> (Linné, 1758)          | 27           | 12            |
| <i>Arianta arbustorum</i> (Linné, 1758)        | 22           | 11            |
| <i>Vitrina pellucida</i> (Müller, 1774)        | 20           | 16            |
| <i>Xerolenta obvia</i> (Menke, 1828)           | 18           | 12            |
| <i>Zonitoides nitidus</i> (Müller, 1774)       | 18           | 13            |
| <i>Monachoides incarnatus</i> (Müller, 1774)   | 16           | 12            |
| <i>Aegopinella minor</i> (Stabile, 1864)       | 15           | 10            |
| <i>Oxychilus cellarius</i> (Müller, 1774)      | 15           | 7             |
| <i>Cepaea vindobonensis</i> (Férussac, 1821)   | 11           | 6             |
| <i>Perpolita hammonis</i> (Strøm, 1765)        | 11           | 7             |
| <i>Fruticicola fruticum</i> (Müller, 1774)     | 10           | 10            |
| <i>Succinea putris</i> (Linné, 1758)           | 10           | 8             |
| <i>Succinella oblonga</i> (Draparnaud, 1801)   | 10           | 10            |
| <i>Oxychilus alliarius</i> (Müller, 1774)      | 9            | 3             |
| <i>Arion circumscriptus</i> Johnston, 1828     | 8            | 5             |
| <i>Arion silvaticus</i> Lohmander, 1937        | 8            | 5             |
| <i>Deroceras laeve</i> (Müller, 1774)          | 8            | 7             |
| <i>Vertigo pygmaea</i> (Draparnaud, 1801)      | 8            | 6             |
| <i>Arion intermedius</i> Normand, 1852         | 5            | 3             |
| <i>Cecilioides acicula</i> (Müller, 1774)      | 5            | 5             |
| <i>Urticicola umbrosus</i> (Pfeiffer, 1828)    | 5            | 5             |
| <i>Candidula intersecta</i> (Poiret, 1801)     | 4            | 2             |
| <i>Helicella itala</i> (Linné, 1758)           | 4            | 2             |
| <i>Merdigera obscura</i> (Müller, 1774)        | 4            | 3             |
| <i>Candidula unifasciata</i> (Poiret, 1801)    | 3            | 2             |
| <i>Cochlodina laminata</i> (Montagu, 1803)     | 3            | 3             |
| <i>Deroceras agreste</i> (Linné, 1758)         | 3            | 2             |
| <i>Euomphalia strigella</i> (Draparnaud, 1801) | 3            | 3             |
| <i>Helix lutescens</i> Rossmässler, 1837       | 3            | 1             |
| <i>Laciniaria plicata</i> (Draparnaud, 1801)   | 3            | 3             |
| <i>Trochulus sericeus</i> (Draparnaud, 1801)   | 3            | 2             |
| <i>Carychium tridentatum</i> (Risso, 1826)     | 2            | 2             |
| <i>Clausilia parvula</i> Férussac, 1708        | 2            | 1             |
| <i>Helicodonta obvoluta</i> (Müller, 1774)     | 2            | 2             |

Table S1. Continuation.

|                                                                          | No. of plots | No. of cities |
|--------------------------------------------------------------------------|--------------|---------------|
| <i>Lauria cylindracea</i> (Da Costa, 1778)                               | 2            | 1             |
| <i>Limax cinereoniger</i> Wolf, 1803                                     | 2            | 2             |
| <i>Punctum pygmaeum</i> (Draparnaud, 1801)                               | 2            | 2             |
| <i>Truncatellina cylindrica</i> (Férussac, 1807)                         | 2            | 1             |
| <i>Aegopinella nitens</i> (Michaud, 1831)                                | 1            | 1             |
| <i>Arion fuscus</i> (Müller, 1774)                                       | 1            | 1             |
| <i>Carychium minimum</i> Müller, 1774                                    | 1            | 1             |
| <i>Clausilia bidentata</i> (Strøm, 1765)                                 | 1            | 1             |
| <i>Cochlicopa lubricella</i> (Rossmässler, 1835)                         | 1            | 1             |
| <i>Ena montana</i> (Draparnaud, 1801)                                    | 1            | 1             |
| <i>Granaria frumentum</i> (Draparnaud, 1801)                             | 1            | 1             |
| <i>Helicigona lapicida</i> (Linné, 1758)                                 | 1            | 1             |
| <i>Macrogastera plicatula</i> (Draparnaud, 1801)                         | 1            | 1             |
| <i>Oxychilus glaber</i> (Rossmässler, 1835)                              | 1            | 1             |
| <i>Perforatella bidentata</i> (Gmelin, 1791)                             | 1            | 1             |
| <i>Plicuteria lubomirskii</i> (Ślósarskii, 1881)                         | 1            | 1             |
| <i>Pseudotrachia rubiginosa</i> (Rossmässler, 1838)                      | 1            | 1             |
| <i>Semilimax semilimax</i> (Férussac, 1802)                              | 1            | 1             |
| <i>Tandonia rustica</i> (Millet, 1843)                                   | 1            | 1             |
| <i>Truncatellina callicratis</i> (Scacchi, 1833)                         | 1            | 1             |
| <i>Vitrea crystallina</i> (Müller, 1774)                                 | 1            | 1             |
| <i>Vitrea subrimata</i> (Reinhardt, 1871)                                | 1            | 1             |
| <i>Vitrinobrachium breve</i> (Férussac, 1821)                            | 1            | 1             |
| <b>Non-native species</b>                                                |              |               |
| <i>Arion vulgaris</i> (Moquin-Tandon, 1855)                              | 101          | 29            |
| <i>Deroceras reticulatum</i> (Müller, 1774)                              | 93           | 29            |
| <i>Oxychilus draparnaudi</i> (Beck, 1837)                                | 74           | 28            |
| <i>Arion distinctus</i> Mabilie, 1868                                    | 65           | 25            |
| <i>Deroceras invadens</i> (Reise, Hutchinson, Schunack et Schlitt, 2011) | 43           | 15            |
| <i>Limax maximus</i> Linné, 1758                                         | 43           | 23            |
| <i>Deroceras sturanyi</i> (Simroth, 1894)                                | 33           | 15            |
| <i>Monacha cartusiana</i> (Müller, 1774)                                 | 33           | 19            |
| <i>Hygromia cinctella</i> (Draparnaud, 1801)                             | 25           | 7             |
| <i>Cornu aspersum</i> (Müller, 1774)                                     | 18           | 5             |
| <i>Arion fasciatus</i> (Nilsson, 1823)                                   | 17           | 13            |
| <i>Boettgerilla pallens</i> Simroth, 1912                                | 11           | 9             |
| <i>Tandonia budapestensis</i> (Hazay, 1881)                              | 11           | 8             |
| <i>Zonitoides arboreus</i> (Say, 1816)                                   | 7            | 7             |
| <i>Limacus flavus</i> (Linné, 1758)                                      | 2            | 1             |
| <i>Paralaoma servilis</i> (Shuttleworth, 1852)                           | 2            | 2             |
| <i>Candidula intersecta</i> (Poiret, 1801)                               | 1            | 1             |
| <i>Ceciliooides petitiana</i> (Benoit, 1862)                             | 1            | 1             |
| <i>Eobania vermiculata</i> (Müller, 1774)                                | 1            | 1             |
| <i>Helix cincta</i> Müller, 1774                                         | 1            | 1             |
| <i>Hygromia limbata</i> (Draparnaud, 1805)                               | 1            | 1             |
